# Supplementary material
Source: publisher figshare collection journal article supplement (https://gsapubs.figshare.com/ndownloader/files/34862508)

Vuillemin, A., Mayr, C., Schuessler, J.A., Friese, A., Bauer, K.W., Lücke, A., Heuer, V.B., G, C.lombitza, Henny, C., von Blanckenburg, F., Russell, J.M., Bijaksana, S., Vogel, H., Crowe, S.A., and Kallmeyer, J., 2022, A one-million-year isotope record from siderites formed in modern ferruginous sediments: GSA Bulletin, <https://doi.org/10.1130/B36211.1>.

## Supplemental Material

**Figure S1.** Borehole temperatures with pore water alkalinity, pH, DIC and oxygen isotopes

**Figure S2.** Treatment of bulk sediments and siderite for carbonate dissolution

**Figure S3.** XRD spectra for siderite and vivianite extracts.

**Figure S4.** Age model used for the calibration of the Unit 1 lacustrine sequence

**Figure S5.** Temperature, O<sub>2</sub> concentrations and oxygen isotopes in the water column

**Figure S6.** SEM back-scatter images of magnetite extracts.

**Figure S7.** TEM images and elemental mapping of siderite nuclei

**Figure S8.** Scatter plots of siderite isotope compositions.

**Figure S9.** Syn-depositional and post-depositional processes setting isotope signatures

**Table S1.** Oxygen isotope fractionation factors between different phases and siderite.

**Table S2.** Siderite oxygen isotope values calculated with different acid fractionation factors.

**Table S3.** Results of iron isotopes for data quality control.

**Table S4.** Results of EDS analyses on magnetic extracts and corresponding SEM images.

**Table S5.** Results of EDS analyses on siderite samples and corresponding SEM images.

**Table S6.** Results of EDS analyses on vivianite samples and corresponding SEM images.

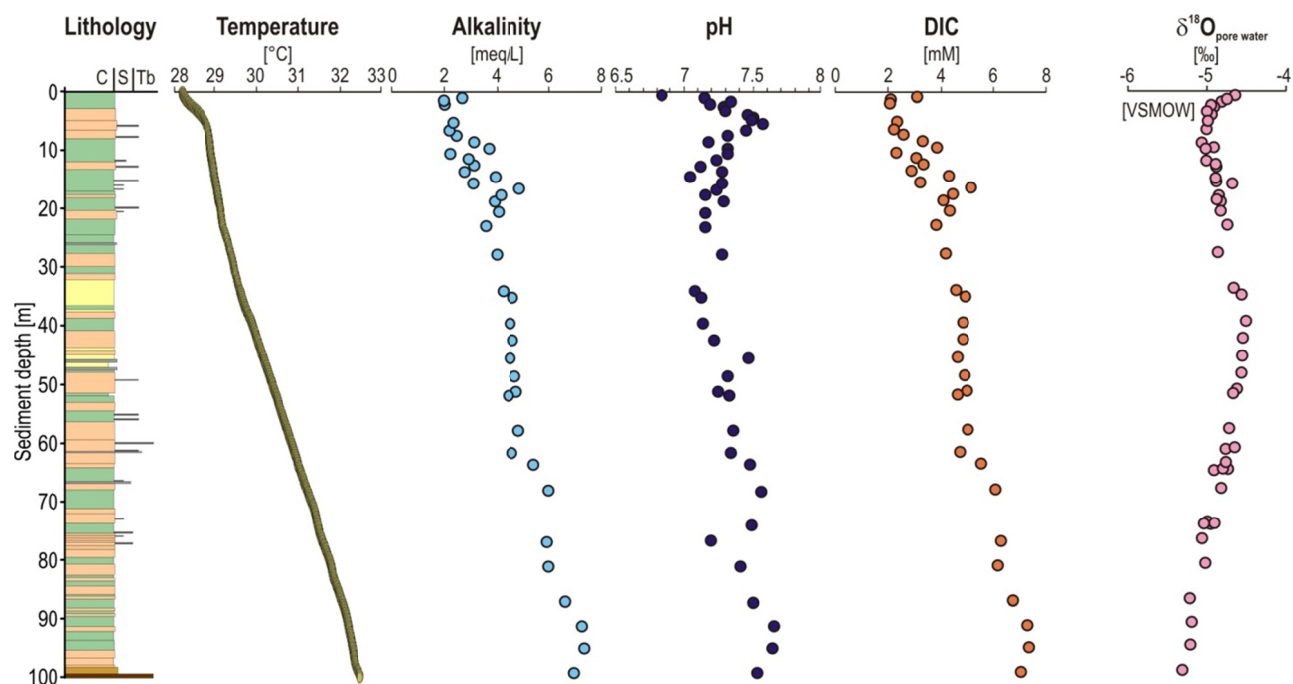

**Supplementary Figure S1. Down core profiles for physicochemical parameters and pore water oxygen isotopes.** From left to right: Borehole temperatures obtained on site via borehole logging, showing an overall increase in temperatures from 28° to 33° C in the 100 m of Unit 1 at hole TDP-1B; alkalinity [ $\text{meq} \times \text{L}^{-1}$ ], and pH measured on pore water at hole TDP-1A; DIC calculated by solving the carbonate system based on the previous two profiles; oxygen isotopes versus VSMOW [‰] in the pore water display little variations despite a temperature increase of 4°C.

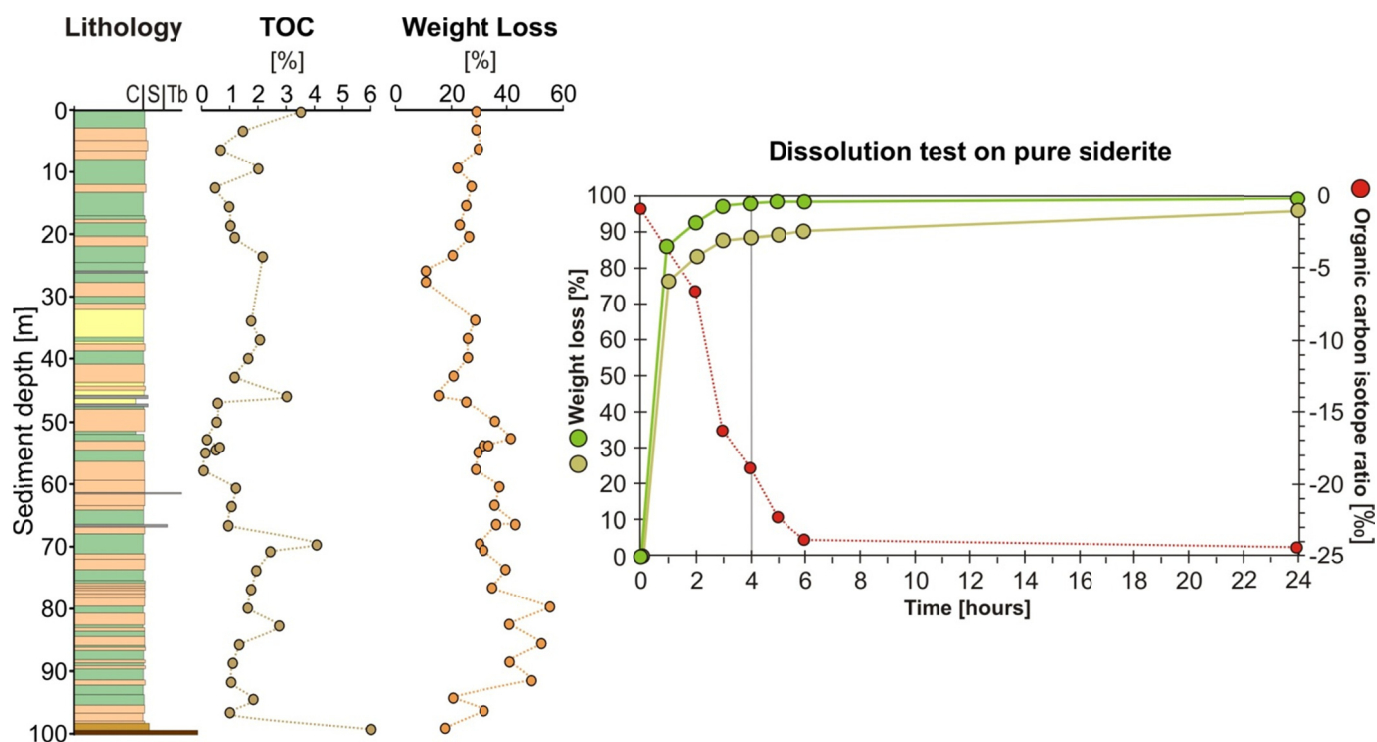

**Supplementary Figure S2. Treatment of bulk sediments and siderite for carbonate dissolution.** Bulk sediment samples were treated with 20 mL of 5 % HCl at 50° C for 24 hours to remove carbonates. This treatment was tested with 200 mg of technical grade siderite to evaluate its dissolution over time. Results show that 85 to 95 % of the siderite weight is dissolved after 2 hours. After 24 hours, >95% of siderite is dissolved, ensuring accurate measurement of both total organic carbon content and  $\delta^{13}\text{C}_{\text{org}}$  composition on bulk sediment.

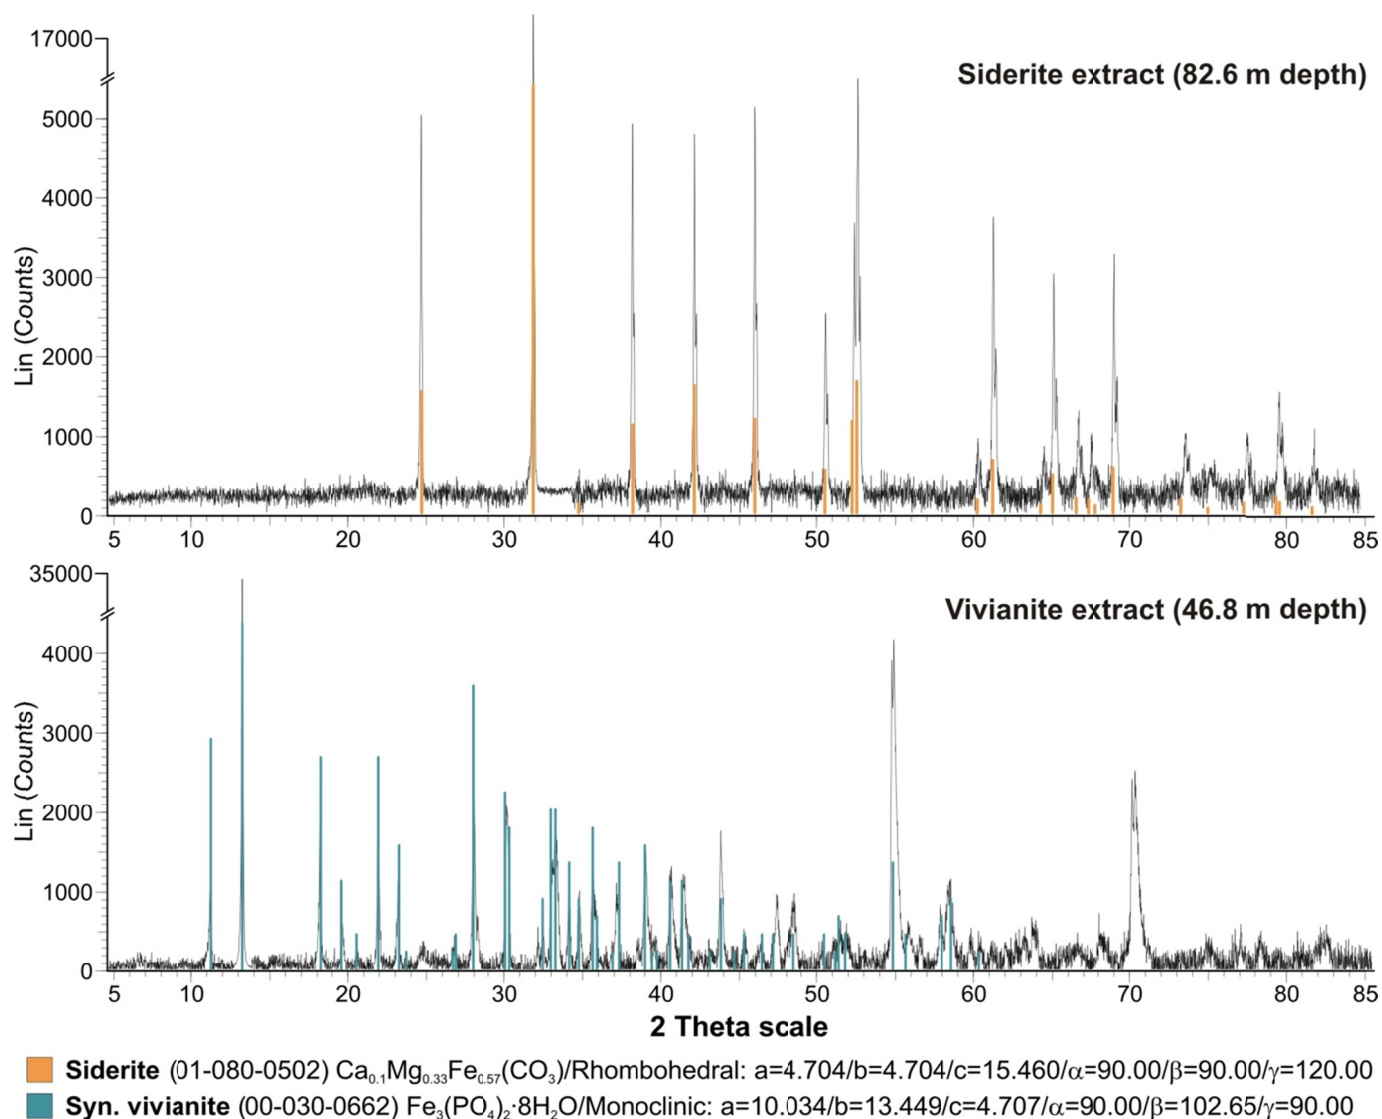

**Supplementary Figure S3. XRD spectra for siderite and vivianite extracts.** XRD spectra of pure siderite (top) and vivianite (bottom) extracts from 86.2 and 46.8 m depth (modified from Vuillemin et al., 2019a, 2020), respectively, with reference peaks of synthetic siderite (orange bars) and vivianite (blue bars).



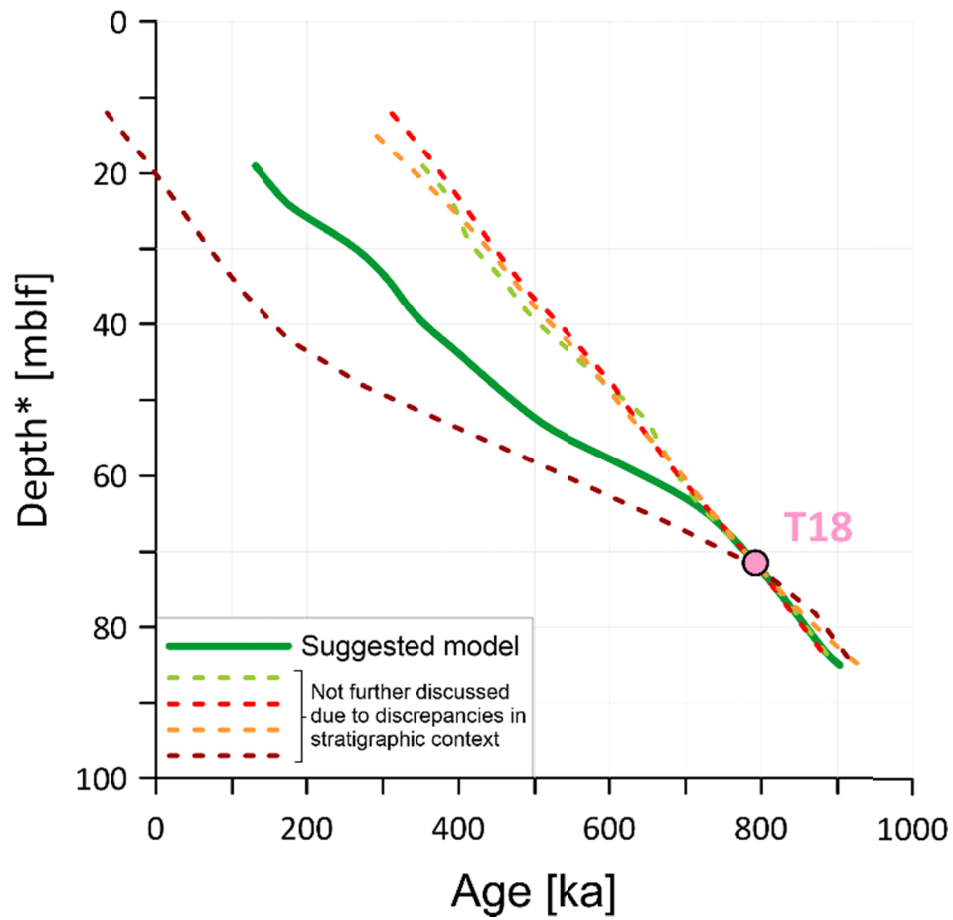

**Supplementary Figure S4. Age-depth models from Lake Towuti Unit 1.** This figure (from Ulfers et al., 2021) displays the age-depth models for the lacustrine sequence (i.e. Unit 1). The upper part was constrained by 20 AMS  $^{14}\text{C}$  ages measured on terrestrial macroremains (Russell et al., 2014). All models are tied to the dated tephra T18 (pink dot) from Russell et al. (2020) at 72.95 mblf.

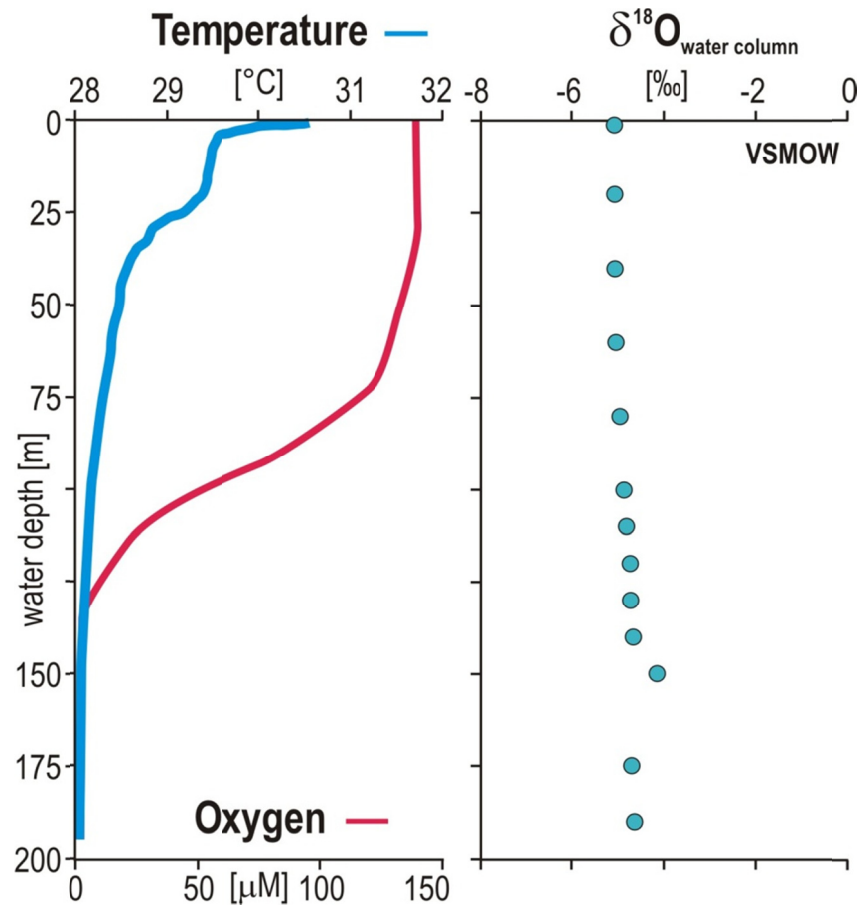

**Supplementary Figure S5. Temperature, oxygen concentrations and isotopes in the water column.** (Left) Down cast of temperature [°C] and oxygen concentration [μM] measured in the water column (from Vuillemin et al., 2016). (Right)  $\delta^{18}\text{O}$  values [‰] relative to VSMOW for water column samples, which remain fairly constant throughout the water column despite a temperature decrease of 2.5°C (see Fig. 4B).

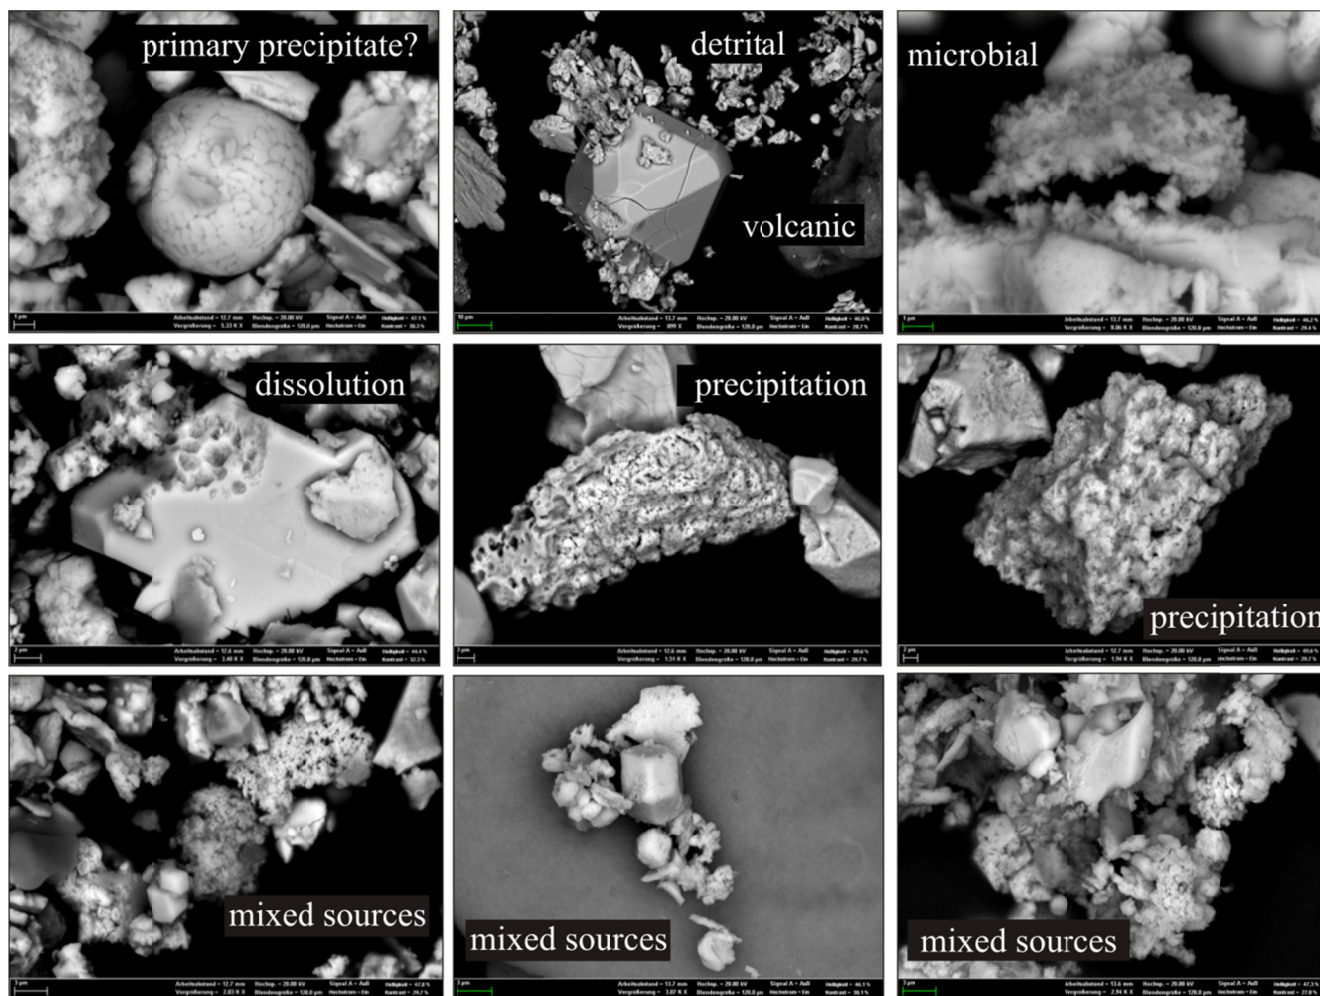

**Supplementary Figure S6. SEM back-scatter images of magnetite extracts illustrating their multiple sources.** The upper left picture (sediment sample: 0.7 m depth) shows a magnetite framboid which could be a primary precipitate from the water column. The origin of magnetite crystals e.g. detrital, volcanic, microbially precipitated are often found as a mixture making hard to discriminate microbially-mediated phases. Nevertheless, features of reductive dissolution and (re)precipitation are commonly observed (modified from Vuillemin et al., 2019a).

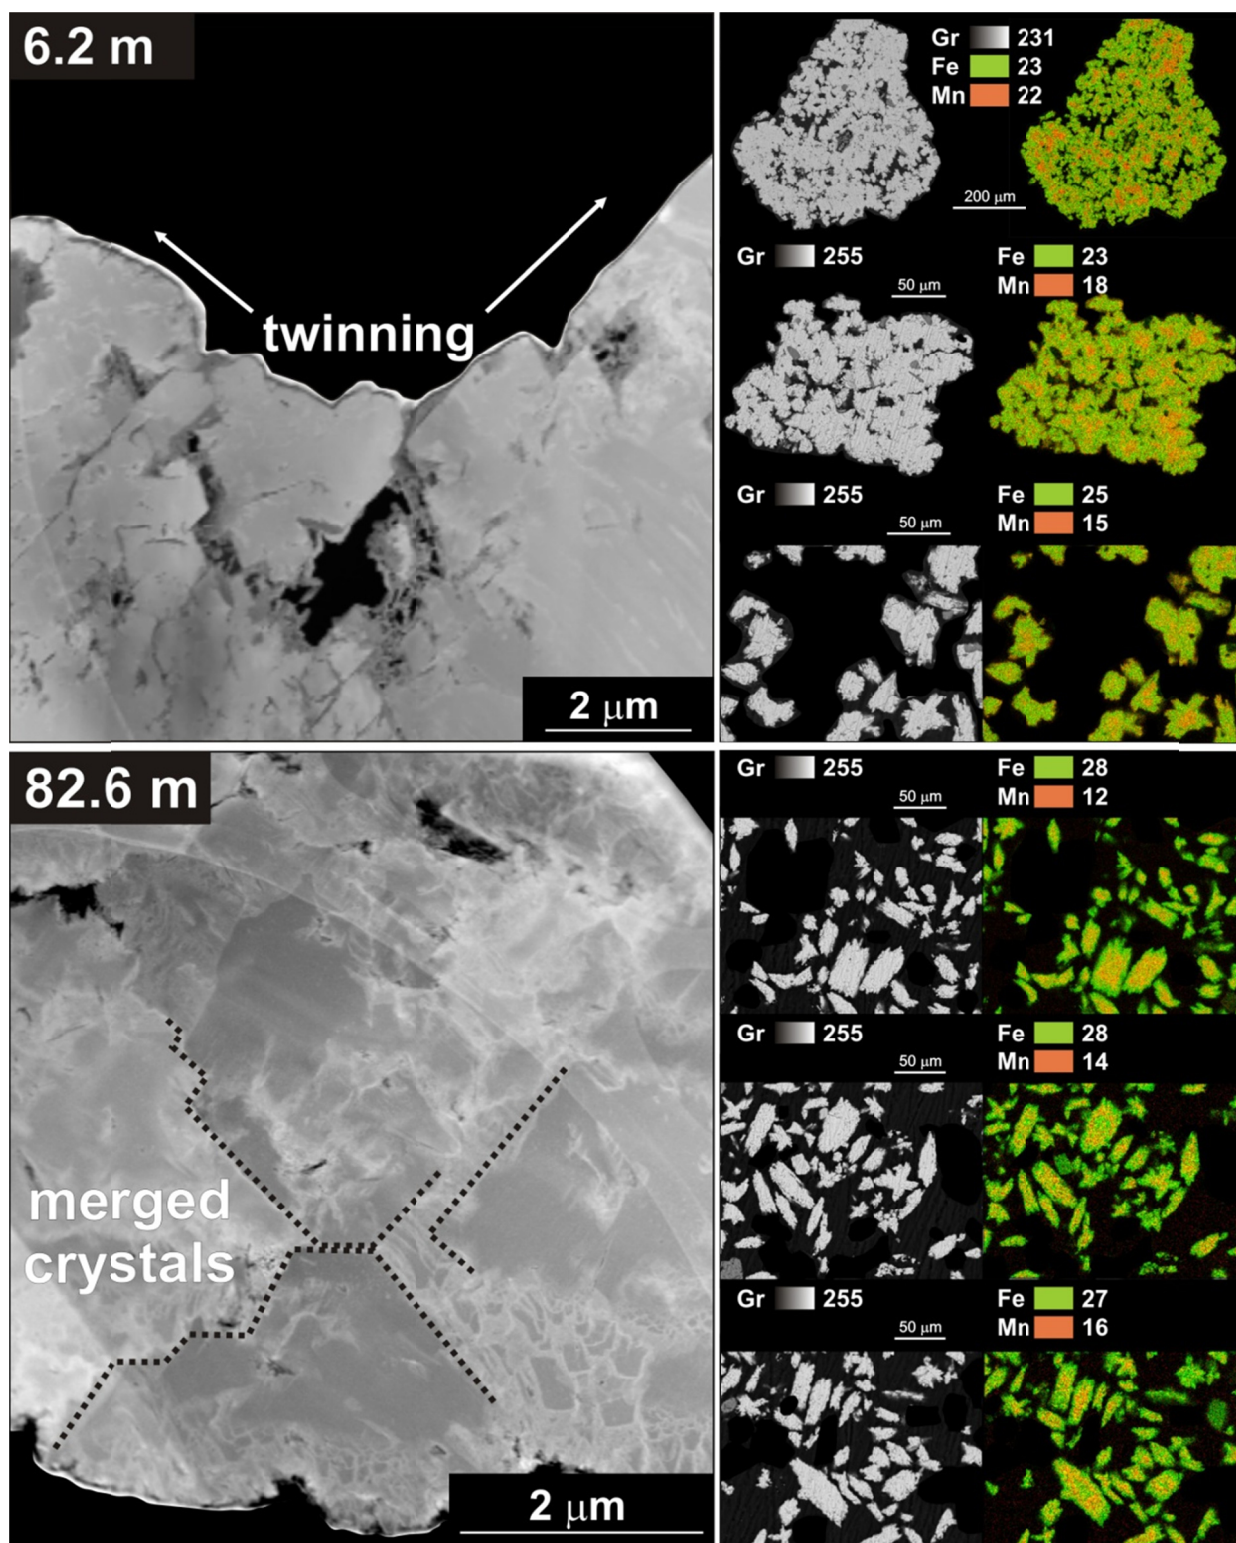

**Supplementary Figure S7. Transmission and scanning electron microscopy imaging of siderites with elemental mapping of nuclei and rims.** (Left) Scanning TEM images of siderite crystals from 6.2 and 82.6 m sediment depth, showing that crystal development through twinning and coalescence into mosaic aggregates. (Right) SEM back-scatter electron images with EDS elemental mapping of thin sections prepared with siderite separates from 6.2 and 82.6 m sediment depth. Stacked intensity images for Fe + Mn indicate that Fe substitution by Mn occurs preferentially in the center of siderite crystals and thereby evidence the presence of nuclei within crystal aggregates (modified from Vuillemin et al., 2019a).



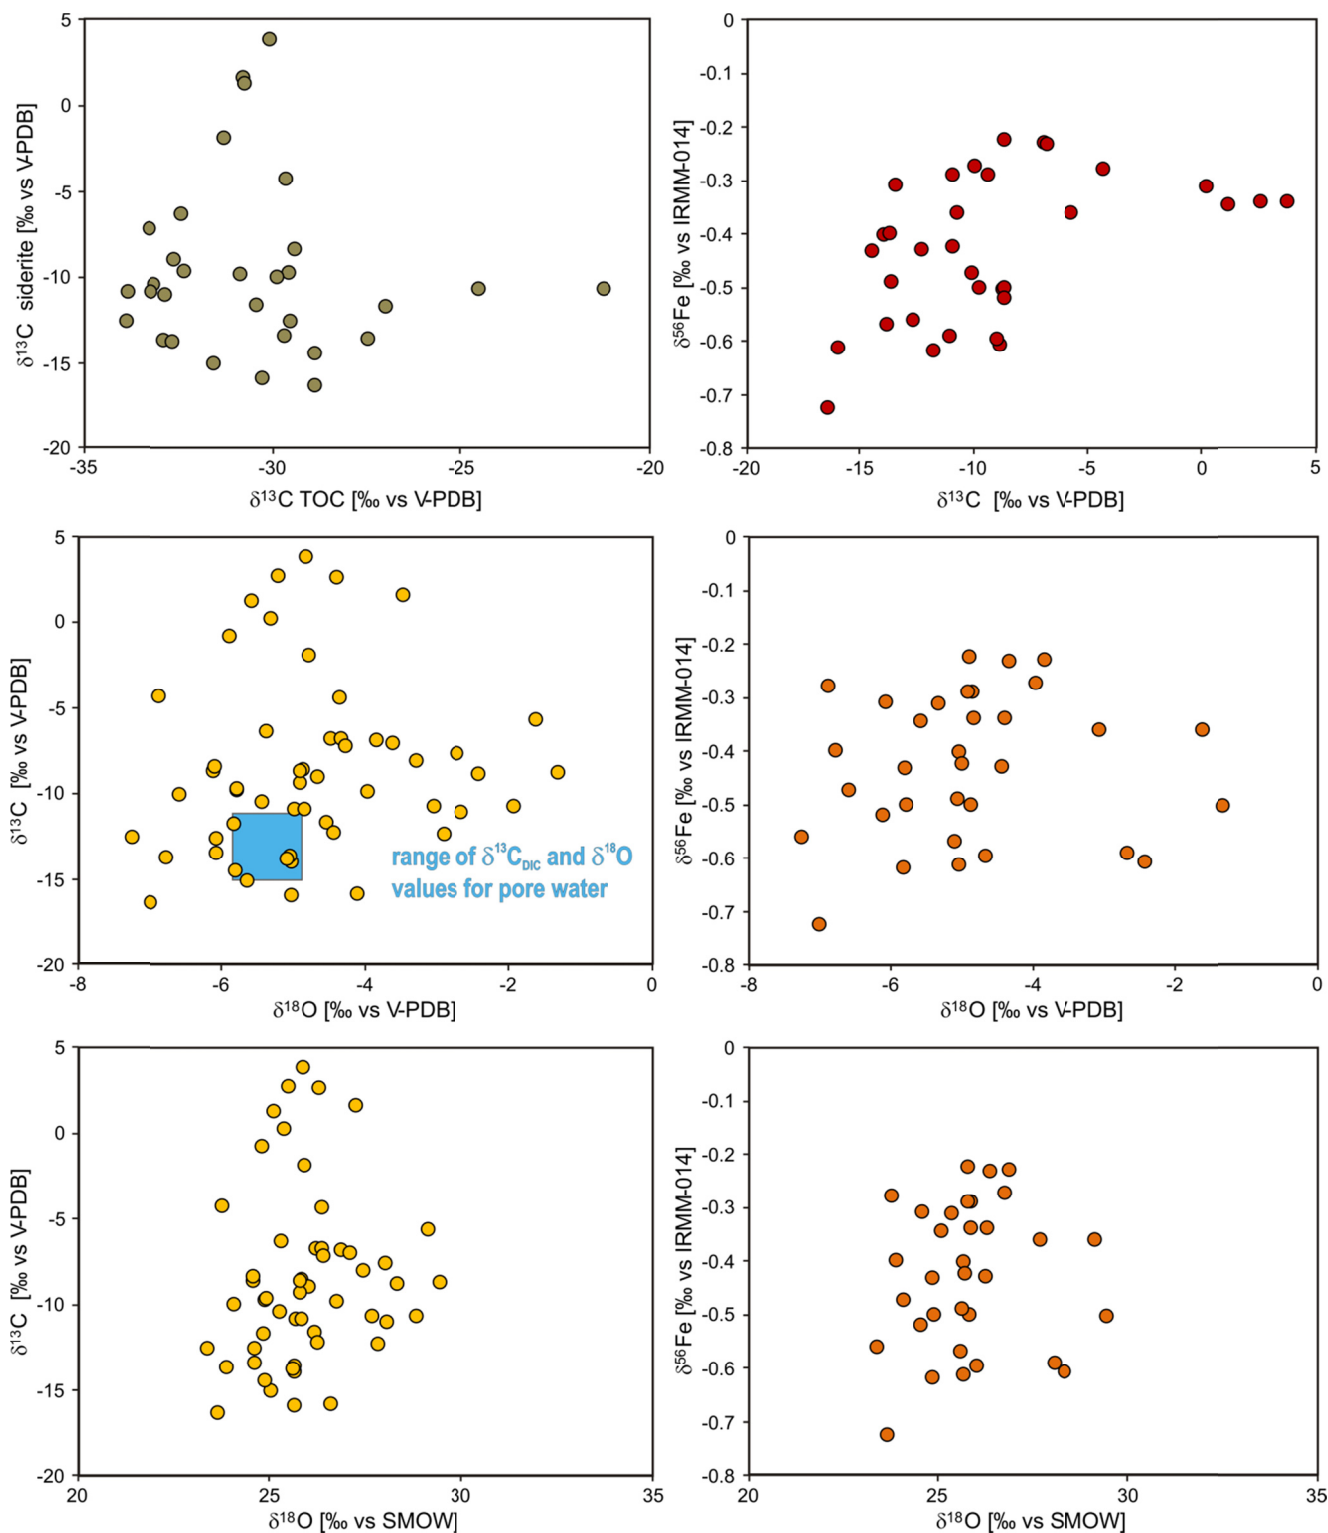

**Supplementary Figure S8. Scatter plots of siderite isotope compositions.** (Top) Carbon isotope composition ( $\delta^{13}\text{C}$  in‰ relative to V-PDB) of TOC versus siderite (left); carbon isotope composition ( $\delta^{13}\text{C}$  in‰ relative to V-PDB) versus iron isotope composition ( $\delta^{56}\text{Fe}$  in‰ relative to IRMM-014) measured on siderites. (Middle) Oxygen isotope composition [‰] relative to V-PDB versus carbon (left) isotope composition [‰] relative to V-PDB, and (right) Fe isotope composition [‰] relative to IRMM-014 measured on siderites. (Bottom) Same scatter plots with  $\delta^{18}\text{O}$  values [‰] relative to VSMOW.

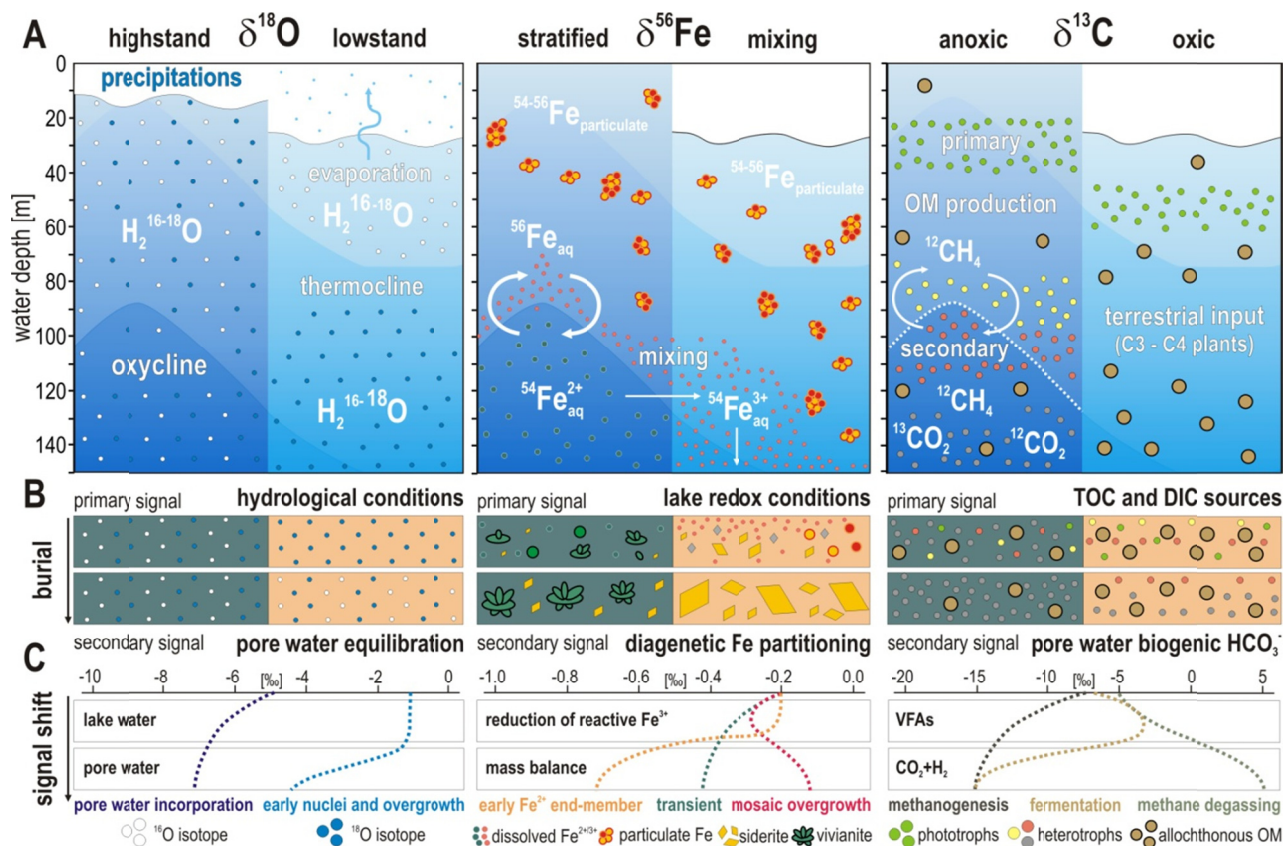

**Supplementary Figure S9. Syn-depositional and post-depositional processes setting the  $\delta^{18}\text{O}$ ,  $\delta^{56}\text{Fe}$  and  $\delta^{13}\text{C}$  signatures in siderites.** (A) Lacustrine conditions, from left to right:  $^{18}\text{O}$  composition related to lake level highstand (left) and lowstand (right); sources of detrital and authigenic ferric phases under stratified (left), mixing (center) and oxic conditions in the water column; processes of organic matter production and remineralization in the water column under stratified (left) and mixing (right) conditions. (B) Evolution of sediment composition during shallow (primary signal) to deep (secondary signal) burial, from left to right: Isotopic equilibration from bottom waters initially reflecting hydrological conditions to pore water composition; dissolution of Fe precipitates reflecting the lake redox conditions and partitioning of dissolved  $\text{Fe}^{2+}$  into diagenetic phases such as vivianite and siderite; remineralization of organic sources through anaerobic processes to methanogenesis wleading to biogenic production of DIC but little degradation of terrestrial organic sources. (C) General trends in isotope signals expected from the incorporation of pore water  $\text{H}_2\text{O}$ , dissolved  $\text{Fe}^{2+}$  and biogenic  $\text{HCO}_3^-$  in siderite in surface (upper case) and deep sediment (lower case), from left to right: Overgrowth on initial siderite nuclei; reductive dissolution of Fe phases; and rates of OM remineralization. Continuous mineral precipitation from saturated pore water leads to a mass balance effect over time.

**Supplementary Table S1. Oxygen isotope fractionation factors between different phases and siderite.**

| Reference                                                                                                      | Phases                                                                                                               | Temperature                                                                                                                                                                                                                                                                                            | Fractionation factor ( $\alpha$ )                                                                                                                                                                                                                                     |
|----------------------------------------------------------------------------------------------------------------|----------------------------------------------------------------------------------------------------------------------|--------------------------------------------------------------------------------------------------------------------------------------------------------------------------------------------------------------------------------------------------------------------------------------------------------|-----------------------------------------------------------------------------------------------------------------------------------------------------------------------------------------------------------------------------------------------------------------------|
| Rosenbaum & Sheppard, 1986<br><br>Equation used:<br>$10^3 \ln \alpha = 6.84 \times 10^5 (1/T^2) + 3.85$        | CO <sub>2</sub> - siderite                                                                                           | 25°C<br>50°C<br><b>70°C</b><br>100°C<br>150°C                                                                                                                                                                                                                                                          | 1.01163<br>not measured<br><b>1.009706</b><br>1.00881<br>1.00771                                                                                                                                                                                                      |
| Carothers et al., 1991<br><br>Pore water to siderite<br>Factor used: 1.03033<br>T° range in Towuti: 28 to 33°C | CO <sub>2</sub> - siderite<br>(phosphoric acid)<br><br>H <sub>2</sub> O - siderite<br><br>H <sub>2</sub> O - calcite | natural 25°C<br>synthetic 25°C<br>natural 50°C<br>synthetic 50°C<br><br><b>33°C</b><br>56°C<br>103°C<br>150°C<br>197°C<br><br>102°C<br>102°C                                                                                                                                                           | 1.01165<br>1.01175<br>1.01079<br>1.01075<br><br><b>1.03033</b><br>1.02640<br>1.01893<br>1.01322<br>1.01067<br><br>1.01750<br>1.01740                                                                                                                                  |
| Swart et al., 1991                                                                                             | CO <sub>2</sub> - calcite<br>(phosphoric acid)                                                                       | LMC acid bath<br>89.9°C<br>81.0°C<br>70.6°C<br>59.7°C<br>50.9°C<br>25.0°C<br>sealed vessel<br>90.0°C<br>75.0°C<br>50.0°C<br>35.0°C<br>25.0°C<br>PSU acid bath<br>89.9°C<br>81.0°C<br>70.6°C<br>59.7°C<br>50.9°C<br>25.0°C<br>sealed vessel<br>89.9°C<br>81.0°C<br>70.6°C<br>59.7°C<br>50.9°C<br>25.0°C | 1.00798<br>1.00816<br>1.00837<br>1.00875<br>1.00898<br>1.00989<br><br>1.00821<br>1.00853<br>1.00924<br>1.00982<br>1.01025<br><br>1.00799<br>1.00823<br>1.00831<br>1.00871<br>1.00904<br>1.00989<br><br>1.00827<br>1.00854<br>1.00929<br>1.00961<br>1.01000<br>1.01025 |
| Mortimer & Coleman, 1997                                                                                       | H <sub>2</sub> O - siderite                                                                                          | Fe pure 30°C<br>Fe pure 30°C                                                                                                                                                                           | 1.0203<br>1.0224<br>1.0257<br>1.0245<br>1.0251<br>1.0275<br>1.0297<br>1.0261                                                                                                                                                                                          |

|                        |                            |                                                                                                                                                                                                                                            |                                                                                                                                                                                          |
|------------------------|----------------------------|--------------------------------------------------------------------------------------------------------------------------------------------------------------------------------------------------------------------------------------------|------------------------------------------------------------------------------------------------------------------------------------------------------------------------------------------|
|                        |                            | Fe pure 35°C<br>Fe pure 25°C<br>Fe pure 35°C<br>Fe pure 40°C<br><br>Mg/Ca 25°C<br>Mg/Ca 30°C<br>Mg/Ca 35°C<br>Mg/Ca 35°C<br><br>Mn 25°C<br>Mn 30°C<br>Mn 35°C<br>Mn 35°C<br>Mn 18°C<br>Mn 25°C<br>Mn 30°C<br>Mn 35°C<br>Mn 35°C<br>Mn 40°C | 1.0258<br>1.0266<br>1.0232<br>1.0239<br><br>1.0278<br>1.0264<br>1.0263<br>1.0241<br><br>1.0220<br>1.0238<br>1.0232<br>1.0237<br>1.0220<br>1.0236<br>1.0235<br>1.0234<br>1.0226<br>1.0221 |
| Fernandez et al., 2016 | CO <sub>2</sub> - siderite | sealed vessel<br>70°C<br>open vessel<br>100°C                                                                                                                                                                                              | <br><b>1.01014 ± 0.0002</b><br><br>1.00983 ± 0.0002                                                                                                                                      |



**Supplementary Table S2. Results of iron isotope analyses on siderite samples and reference materials for data quality control.** Measurement accuracy and precision was assessed by repeated analyses of pure Fe standard solution (HanFe) in each analytical session. This standard gave  $^{56}\text{Fe}$  of  $0.31 \pm 0.02$  (2 s, n=10), identical to results obtained in an inter-laboratory comparison. The procedure was also tested by processing the reference materials COQ-1 and BHVO-2 repeatedly through the same chromatographic separation protocol as the samples, with and without HCl or acetic acid treatment. This method yielded  $^{56}\text{Fe}$  values for COQ-1 of  $-0.04 \pm 0.04$  (2  $\sigma$ , n=4),  $-0.02 \pm 0.04$  (2  $\sigma$ , n=4),  $-0.05 \pm 0.04$  (2  $\sigma$ , n=2), and for BHVO-2  $-0.12 \pm 0.01$  (2  $\sigma$ , n=2), which are in agreement with published results. In addition, a pure siderite mineral powder was used to test the acetic acid leaching method. The  $^{56}\text{Fe}$  results of siderite leached with 10 % acetic acid ( $-0.37\text{‰}$ ) are identical to the reference value obtained by complete dissolution of the same siderite powder in 6M HCl ( $-0.35\text{‰}$ ).

| sample          | dissolution procedure                        | $\delta^{56}\text{Fe}$ | depth (mblf) | sample           | dissolution procedure                        | $\delta^{56}\text{Fe}$ | depth (mblf) |
|-----------------|----------------------------------------------|------------------------|--------------|------------------|----------------------------------------------|------------------------|--------------|
| <i>siderite</i> |                                              |                        |              | 17H1             | 10 % acetic acid, 24h                        | -0.59                  | 41.1         |
| 1H1             | 10 % acetic acid, 24h                        | -0.23                  | 0.2          | 18H1             | 10 % acetic acid, 24h                        | -0.56                  | 43.0         |
| 3H3             | 10 % acetic acid, 24h                        | -0.36                  | 6.2          | 22H3             | 10 % acetic acid, 24h                        | -0.62                  | 49.4         |
| 5H3             | 10 % acetic acid, 24h                        | -0.50                  | 12.4         | 24H2             | 10 % acetic acid, 24h                        | -0.73                  | 52.8         |
| 15A3            | 10 % acetic acid, 24h                        | -0.40                  | 36.7         | 25H1             | 10 % acetic acid, 24h                        | -0.61                  | 54.2         |
| 29H3            | 10 % acetic acid, 24h                        | -0.43                  | 36.7         | 28H3             | 10 % acetic acid, 24h                        | -0.49                  | 60.3         |
| 34H3            | 10 % acetic acid, 24h                        | -0.29                  | 76.7         | 30H3             | 10 % acetic acid, 24h                        | -0.60                  | 65.7         |
| 36H3            | 10 % acetic acid, 24h                        | -0.25                  | 82.6         | 31H1             | 10 % acetic acid, 24h                        | -0.57                  | 67.1         |
| 36H3            | 10 % acetic acid, 24h replicate <sup>a</sup> | -0.22                  | 82.6         | 33H2             | 10 % acetic acid, 24h replicate <sup>a</sup> | -0.42                  | 71.4         |
| 37H3            | 10 % acetic acid, 24h                        | -0.28                  | 85.6         | 35H3             | 10 % acetic acid, 24h                        | -0.27                  | 78.8         |
| 38H3            | 10 % acetic acid, 24h                        | -0.31                  | 88.6         | 36H1             | 10 % acetic acid, 24h                        | -0.23                  | 80.8         |
| 39H3            | 10 % acetic acid, 24h                        | -0.34                  | 91.6         |                  |                                              |                        |              |
| 41H3            | 10 % acetic acid, 24h                        | -0.34                  | 96.4         |                  |                                              |                        |              |
| 48H3            | 10 % acetic acid, 24h                        | -0.28                  | 113.6        | <i>vivianite</i> |                                              |                        |              |
| 4H2             | 10 % acetic acid, 24h                        | -0.50                  | 7.1          | 9H3              | 2M nitric acid, 24h                          | -0.44                  | 23.4         |
| 4H4             | 10 % acetic acid, 24h                        | -0.61                  | 8.8          | 9H3              | 2M nitric acid, 24h                          | -0.52                  | 23.4         |
| 7H6             | 10 % acetic acid, 24h                        | -0.31                  | 18.0         | 15A3             | 2M nitric acid, 24h                          | -0.61                  | 36.7         |
| 9H2A            | 10 % acetic acid, 24h                        | -0.52                  | 21.2         | 21A1             | 2M nitric acid, 24h                          | -0.46                  | 46.8         |
| 9H3             | 10 % acetic acid, 24h                        | -0.47                  | 21.8         | 21A1             | 2M nitric acid, 24h                          | -0.39                  | 46.8         |

| reference |                                              | $\delta^{56}\text{Fe}$ | 2 $\sigma$ deviation | literature |                                  | $\delta^{56}\text{Fe}$ |                             |
|-----------|----------------------------------------------|------------------------|----------------------|------------|----------------------------------|------------------------|-----------------------------|
| HanFe     | pure Fe solution - not processed             | 0.31                   | $\pm 0.02$ (n=10)    | HanFe      | pure Fe solution - not processed | 0.29                   | Moeller et al. (2014)       |
| BHVO-2    | 10% acet. acid/24h, then HF/HNO <sub>3</sub> | -0.12                  | $\pm 0.01$ (n=2)     | COQ-1      | total digestion                  | -0.12                  | Craddock and Dauphas (2011) |
| COQ-1     | 10% acet. acid/24h, then HF/HNO <sub>3</sub> | -0.05                  | $\pm 0.04$ (n=2)     | COQ-1      | total digestion                  | 0.00                   | Dideriksen et al. (2006)    |
| COQ-1     | 6M HCl/24h, then HF/HNO <sub>3</sub>         | -0.02                  | $\pm 0.04$ (n=4)     | COQ-1      | total digestion                  | 0.07                   | Dideriksen et al. (2006)    |
| COQ-1     | HCl/HF/HNO <sub>3</sub> total digestion      | -0.04                  | $\pm 0.04$ (n=4)     | COQ-1      | total digestion                  | -0.07                  | He et al. (2015)            |
|           |                                              |                        |                      | BHVO-2     | total digestion                  | 0.11                   | Craddock and Dauphas (2011) |

The uncertainty in the Fe isotope data is 0.05 ‰ (2  $\sigma$ ,  $\delta^{56}\text{Fe}$ ).

<sup>a</sup>Full procedure replicate incl. sample dissolution of a different crystal (vivianite), Fe column chemistry purification and measurement by MC-ICP-MS.

**Supplementary Table S3. Results of EDS analyses on magnetic extracts and corresponding SEM images. Potential authigenic magnetites are signified by values in red font.**

| Depth (mbil) | Sample          | O [atomic %] | Fe [atomic %] | Mn [atomic %] | Ni [atomic %] | Cr+Ti [atomic %] | V,Cu,Zn,Mo [atomic %] | Trace metal Mn [%] |
|--------------|-----------------|--------------|---------------|---------------|---------------|------------------|-----------------------|--------------------|
| 0.16         | Crystal 1 pt.1  | 70.82        | 28.73         | 0.31          | 0.14          | 0.00             | 0.00                  | 68.88              |
| 0.16         | Crystal 1 pt.2  | 75.37        | 23.62         | 0.79          | 0.15          | 0.06             | 0.00                  | <b>78.90</b>       |
| 0.16         | Crystal 1 pt.3  | 74.61        | 25.17         | 0.00          | 0.17          | 0.05             | 0.00                  | 0.00               |
| 0.16         | Crystal 1 pt.4  | 63.56        | 35.43         | 0.38          | 0.63          | 0.00             | 0.00                  | 37.60              |
| 0.16         | Crystal 3 pt.1  | 68.43        | 30.98         | 0.54          | 0.00          | 0.05             | 0.00                  | <b>92.28</b>       |
| 0.16         | Crystal 3 pt.2  | 62.73        | 36.01         | 0.79          | 0.39          | 0.08             | 0.00                  | 62.97              |
| 0.16         | Crystal 3 pt.3  | 74.92        | 24.32         | 0.70          | 0.00          | 0.05             | 0.00                  | <b>93.93</b>       |
| 0.16         | Crystal 3 pt.4  | 73.16        | 25.98         | 0.74          | 0.08          | 0.04             | 0.00                  | <b>86.47</b>       |
| 0.16         | Crystal 3 pt.5  | 81.13        | 18.18         | 0.39          | 0.23          | 0.07             | 0.00                  | 56.49              |
| 0.16         | Crystal 3 pt.6  | 80.52        | 18.70         | 0.15          | 0.24          | 0.33             | 0.06                  | 18.93              |
| 0.16         | Crystal 3 pt.7  | 74.20        | 25.37         | 0.22          | 0.14          | 0.07             | 0.00                  | 50.76              |
| 0.16         | Crystal 3 pt.8  | 79.88        | 18.98         | 0.14          | 0.00          | 1.00             | 0.00                  | 12.06              |
| 0.16         | Crystal 3 pt.9  | 74.74        | 22.95         | 0.43          | 1.59          | 0.30             | 0.00                  | 18.48              |
| 0.16         | Crystal 4 pt.1  | 63.90        | 35.38         | 0.27          | 0.33          | 0.11             | 0.00                  | 38.31              |
| 0.16         | Crystal 4 pt.2  | 70.23        | 28.85         | 0.24          | 0.40          | 0.15             | 0.14                  | 25.49              |
| 0.16         | Crystal 4 pt.3  | 71.92        | 27.11         | 0.51          | 0.41          | 0.05             | 0.00                  | 52.73              |
| 0.16         | Crystal 4 pt.4  | 82.65        | 16.73         | 0.33          | 0.20          | 0.08             | 0.00                  | 54.23              |
| 0.16         | Crystal 4 pt.5  | 80.84        | 18.59         | 0.26          | 0.31          | 0.00             | 0.00                  | 45.49              |
| 0.16         | Crystal 4 pt.6  | 65.56        | 34.08         | 0.00          | 0.00          | 0.24             | 0.12                  | 0.00               |
| 0.16         | Crystal 5 pt.1  | 74.07        | 23.93         | 0.57          | 1.40          | 0.03             | 0.00                  | 28.57              |
| 0.16         | Crystal 5 pt.2  | 71.08        | 24.31         | 0.25          | 0.25          | 4.03             | 0.09                  | 5.35               |
| 0.16         | Crystal 5 pt.3  | 79.84        | 19.51         | 0.43          | 0.16          | 0.05             | 0.00                  | 66.46              |
| 0.16         | Crystal 5 pt.4  | 75.14        | 24.26         | 0.20          | 0.29          | 0.11             | 0.00                  | 32.94              |
| 0.16         | Crystal 5 pt.5  | 75.55        | 22.12         | 0.21          | 2.11          | 0.00             | 0.00                  | 9.22               |
| 0.16         | Crystal 5 pt.6  | 65.51        | 34.49         | 0.00          | 0.00          | 0.00             | 0.00                  | 0.00               |
| 0.16         | Crystal 5 pt.7  | 72.64        | 27.20         | 0.16          | 0.00          | 0.00             | 0.00                  | <b>100.00</b>      |
| 0.16         | Crystal 6 pt.1  | 64.36        | 35.32         | 0.32          | 0.00          | 0.00             | 0.00                  | <b>100.00</b>      |
| 0.16         | Crystal 6 pt.2  | 71.95        | 27.30         | 0.37          | 0.32          | 0.07             | 0.00                  | 48.89              |
| 0.16         | Crystal 6 pt.3  | 68.96        | 30.19         | 0.59          | 0.20          | 0.06             | 0.00                  | <b>69.78</b>       |
| 0.16         | Crystal 6 pt.4  | 77.38        | 22.27         | 0.21          | 0.10          | 0.04             | 0.00                  | 60.50              |
| 0.16         | Crystal 6 pt.5  | 82.98        | 16.72         | 0.25          | 0.00          | 0.06             | 0.00                  | <b>81.96</b>       |
| 0.16         | Crystal 7 pt.1  | 69.17        | 30.43         | 0.23          | 0.00          | 0.17             | 0.00                  | 57.88              |
| 0.16         | Crystal 7 pt.2  | 61.67        | 37.80         | 0.39          | 0.00          | 0.14             | 0.00                  | <b>73.54</b>       |
| 0.16         | Crystal 7 pt.3  | 80.06        | 19.20         | 0.40          | 0.30          | 0.04             | 0.00                  | 54.30              |
| 6.25         | Crystal 2 pt.1  | 71.50        | 27.93         | 0.56          | 0.00          | 0.00             | 0.00                  | <b>100.00</b>      |
| 6.25         | Crystal 2 pt.2  | 72.01        | 26.99         | 0.21          | 0.41          | 0.39             | 0.00                  | 20.60              |
| 6.25         | Crystal 2 pt.3  | 75.28        | 24.21         | 0.20          | 0.31          | 0.00             | 0.00                  | 39.32              |
| 6.25         | Crystal 2 pt.4  | 72.13        | 27.07         | 0.52          | 0.15          | 0.13             | 0.00                  | 65.31              |
| 6.25         | Crystal 2 pt.5  | 67.94        | 30.54         | 0.57          | 0.79          | 0.16             | 0.00                  | 37.52              |
| 6.25         | Crystal 2 pt.6  | 70.92        | 27.43         | 0.51          | 0.81          | 0.26             | 0.07                  | 30.70              |
| 6.25         | Crystal 2 pt.7  | 75.45        | 23.79         | 0.51          | 0.21          | 0.04             | 0.00                  | 66.57              |
| 12.35        | Crystal 2 pt.1  | 75.84        | 23.53         | 0.63          | 0.00          | 0.00             | 0.00                  | <b>100.00</b>      |
| 12.35        | Crystal 2 pt.2  | 86.76        | 12.52         | 0.39          | 0.33          | 0.00             | 0.00                  | 53.85              |
| 12.35        | Crystal 2 pt.3  | 82.17        | 17.51         | 0.32          | 0.00          | 0.00             | 0.00                  | <b>100.00</b>      |
| 12.35        | Crystal 2 pt.4  | 69.23        | 33.22         | 0.55          | 0.00          | 0.00             | 0.00                  | <b>100.00</b>      |
| 12.35        | Crystal 2 pt.5  | 78.74        | 20.64         | 0.46          | 0.16          | 0.00             | 0.00                  | 74.66              |
| 12.35        | Crystal 2 pt.6  | 76.28        | 23.00         | 0.36          | 0.37          | 0.00             | 0.00                  | 49.13              |
| 12.35        | Crystal 2 pt.7  | 76.74        | 22.52         | 0.54          | 0.19          | 0.00             | 0.00                  | 73.53              |
| 12.35        | Crystal 2 pt.8  | 80.91        | 18.68         | 0.29          | 0.00          | 0.00             | 0.12                  | 69.82              |
| 12.35        | Crystal 7 pt.1  | 70.49        | 28.85         | 0.52          | 0.14          | 0.00             | 0.00                  | <b>78.38</b>       |
| 12.35        | Crystal 7 pt.2  | 70.74        | 28.22         | 0.60          | 0.40          | 0.04             | 0.00                  | 57.43              |
| 12.35        | Crystal 7 pt.3  | 72.88        | 25.54         | 0.49          | 0.99          | 0.10             | 0.00                  | 31.14              |
| 12.35        | Crystal 7 pt.4  | 70.18        | 28.69         | 0.49          | 0.60          | 0.05             | 0.00                  | 43.04              |
| 12.35        | Crystal 7 pt.5  | 72.25        | 26.77         | 0.51          | 0.47          | 0.00             | 0.00                  | 51.93              |
| 12.35        | Crystal 7 pt.6  | 64.43        | 33.76         | 0.75          | 0.92          | 0.14             | 0.00                  | 41.17              |
| 36.74        | Crystal 1 pt.1  | 72.86        | 24.06         | 0.31          | 0.00          | 2.67             | 0.11                  | 10.00              |
| 36.74        | Crystal 1 pt.2  | 84.51        | 15.04         | 0.22          | 0.16          | 0.07             | 0.00                  | 47.99              |
| 82.6         | Crystal 1 pt.1  | 82.78        | 8.08          | 0.14          | 0.00          | 8.96             | 0.05                  | 1.51               |
| 82.6         | Crystal 1 pt.2  | 69.93        | 29.35         | 0.12          | 0.00          | 0.60             | 0.00                  | 17.31              |
| 82.6         | Crystal 1 pt.3  | 77.50        | 20.95         | 0.18          | 0.45          | 0.92             | 0.00                  | 11.47              |
| 82.6         | Crystal 1 pt.4  | 83.43        | 13.10         | 0.18          | 0.00          | 3.24             | 0.05                  | 5.09               |
| 82.6         | Crystal 1 pt.5  | 67.42        | 31.95         | 0.00          | 0.11          | 0.52             | 0.00                  | 0.00               |
| 82.6         | Crystal 1 pt.6  | 74.62        | 12.15         | 0.22          | 0.00          | 12.95            | 0.06                  | 1.87               |
| 82.6         | Crystal 2 pt.1  | 70.86        | 27.44         | 0.00          | 0.11          | 1.45             | 0.14                  | 0.00               |
| 82.6         | Crystal 2 pt.2  | 74.77        | 24.77         | 0.26          | 0.14          | 0.06             | 0.00                  | 56.33              |
| 82.6         | Crystal 2 pt.3  | 72.54        | 27.42         | 0.00          | 0.00          | 0.04             | 0.00                  | 0.00               |
| 82.6         | Crystal 2 pt.4  | 72.27        | 26.78         | 0.55          | 0.32          | 0.09             | 0.00                  | 57.52              |
| 82.6         | Crystal 2 pt.5  | 83.49        | 16.03         | 0.39          | 0.03          | 0.06             | 0.00                  | <b>80.81</b>       |
| 82.6         | Crystal 2 pt.6  | 85.68        | 13.53         | 0.13          | 0.06          | 0.60             | 0.00                  | 16.13              |
| 82.6         | Crystal 2 pt.7  | 74.70        | 24.83         | 0.00          | 0.00          | 0.47             | 0.00                  | 0.00               |
| 82.6         | Crystal 2 pt.8  | 74.47        | 25.38         | 0.00          | 0.07          | 0.08             | 0.00                  | 0.00               |
| 82.6         | Crystal 2 pt.9  | 80.77        | 19.06         | 0.00          | 0.00          | 0.17             | 0.00                  | 0.00               |
| 82.6         | Crystal 2 pt.10 | 85.48        | 14.22         | 0.08          | 0.10          | 0.12             | 0.00                  | 26.71              |
| 82.6         | Crystal 2 pt.11 | 88.26        | 11.17         | 0.22          | 0.15          | 0.21             | 0.00                  | 37.60              |
| 82.6         | Crystal 3 pt.1  | 76.06        | 23.15         | 0.31          | 0.39          | 0.09             | 0.00                  | 39.93              |
| 82.6         | Crystal 3 pt.2  | 79.58        | 20.00         | 0.17          | 0.19          | 0.05             | 0.00                  | 41.70              |
| 82.6         | Crystal 3 pt.3  | 74.62        | 24.65         | 0.40          | 0.24          | 0.09             | 0.00                  | 54.72              |
| 82.6         | Crystal 3 pt.4  | 95.15        | 4.58          | 0.00          | 0.10          | 0.7              | 0.00                  | 0.00               |
| 82.6         | Crystal 3 pt.5  | 76.97        | 22.22         | 0.27          | 0.39          | 0.4              | 0.00                  | 33.59              |
| 82.6         | Crystal 3 pt.6  | 76.18        | 23.77         | 0.00          | 0.00          | 0.05             | 0.00                  | 0.00               |
| 82.6         | Crystal 3 pt.7  | 74.26        | 19.10         | 0.25          | 0.10          | 6.09             | 0.21                  | 3.73               |
| 82.6         | Crystal 4 pt.1  | 77.02        | 22.76         | 0.00          | 0.00          | 0.9              | 0.02                  | 0.00               |
| 82.6         | Crystal 4 pt.2  | 72.96        | 26.43         | 0.44          | 0.10          | 0.07             | 0.00                  | <b>72.79</b>       |
| 82.6         | Crystal 4 pt.3  | 72.96        | 26.90         | 0.00          | 0.00          | 0.4              | 0.00                  | 0.00               |
| 82.6         | Crystal 4 pt.4  | 72.03        | 27.88         | 0.00          | 0.00          | 0.08             | 0.00                  | 0.00               |
| 82.6         | Crystal 4 pt.5  | 77.61        | 12.27         | 0.20          | 0.00          | 9.03             | 0.09                  | 1.94               |
| 82.6         | Crystal 4 pt.6  | 62.90        | 36.77         | 0.00          | 0.00          | 0.9              | 0.14                  | 0.00               |
| 82.6         | Crystal 4 pt.7  | 75.27        | 24.39         | 0.20          | 0.09          | 0.65             | 0.00                  | 57.27              |
| 82.6         | Crystal 4 pt.8  | 73.54        | 26.34         | 0.00          | 0.03          | 0.09             | 0.00                  | 0.00               |
| 82.6         | Crystal 4 pt.9  | 72.14        | 27.64         | 0.00          | 0.00          | 0.21             | 0.00                  | 0.00               |
| 82.6         | Crystal 5 pt.1  | 73.57        | 26.27         | 0.00          | 0.00          | 0.5              | 0.00                  | 0.00               |
| 82.6         | Crystal 5 pt.2  | 72.39        | 27.30         | 0.15          | 0.00          | 0.2              | 0.04                  | 48.78              |
| 82.6         | Crystal 5 pt.3  | 76.10        | 23.81         | 0.00          | 0.00          | 0.09             | 0.00                  | 0.00               |
| 82.6         | Crystal 5 pt.4  | 61.16        | 38.44         | 0.00          | 0.00          | 0.25             | 0.14                  | 0.00               |
| 82.6         | Crystal 5 pt.5  | 76.70        | 15.65         | 0.15          | 0.00          | 7.5              | 0.05                  | 2.00               |
| 82.6         | Crystal 5 pt.6  | 68.98        | 30.20         | 0.15          | 0.22          | 0.44             | 0.00                  | 18.85              |
| 82.6         | Crystal 5 pt.7  | 74.73        | 24.52         | 0.24          | 0.21          | 0.23             | 0.06                  | 32.70              |
| 82.6         | Crystal 6 pt.1  | 66.10        | 33.65         | 0.00          | 0.14          | 0.0              | 0.00                  | 0.00               |
| 82.6         | Crystal 6 pt.2  | 71.11        | 28.27         | 0.22          | 0.28          | 0.11             | 0.00                  | 35.86              |
| 82.6         | Crystal 6 pt.3  | 90.40        | 9.11          | 0.00          | 0.16          | 0.33             | 0.00                  | 0.00               |
| 82.6         | Crystal 6 pt.4  | 62.99        | 36.61         | 0.00          | 0.31          | 0.09             | 0.00                  | 0.00               |
| 91.57        | Crystal 1 pt.1  | 74.17        | 25.03         | 0.49          | 0.23          | 0.08             | 0.00                  | 61.68              |
| 91.57        | Crystal 1 pt.2  | 72.30        | 24.51         | 0.00          | 0.19          | 2.85             | 0.06                  | 0.00               |
| 91.57        | Crystal 1 pt.3  | 75.48        | 23.68         | 0.57          | 0.15          | 0.2              | 0.00                  | 67.63              |
| 91.57        | Crystal 1 pt.4  | 73.95        | 25.36         | 0.16          | 0.20          | 0.2              | 0.00                  | 23.54              |
| 91.57        | Crystal 1 pt.5  | 65.69        | 33.15         | 0.54          | 0.41          | 0.3              | 0.07                  | 46.87              |
| 91.57        | Crystal 1 pt.6  | 74.14        | 24.83         | 0.51          | 0.42          | 0.0              | 0.00                  | 49.60              |
| 91.57        | Crystal 1 pt.7  | 74.80        | 24.98         | 0.00          | 0.00          | 0.22             | 0.00                  | 0.00               |
| 91.57        | Crystal 2 pt.1  | 75.51        | 24.15         | 0.00          | 0.00          | 0.28             | 0.06                  | 0.00               |
| 91.57        | Crystal 3 pt.1  | 74.31        | 24.21         | 0.00          | 0.00          | 1.49             | 0.00                  | 0.00               |
| 91.57        | Crystal 3 pt.2  | 64.59        | 34.47         | 0.69          | 0.16          | 0.09             | 0.00                  | <b>73.78</b>       |
| 91.57        | Crystal 3 pt.3  | 80.23        | 19.52         | 0.14          | 0.12          | 0.00             | 0.00                  | 54.47              |
| 91.57        | Crystal 3 pt.4  | 76.05        | 23.31         | 0.48          | 0.00          | 0.07             | 0.09                  | <b>75.40</b>       |
| 91.57        | Crystal 3 pt.5  | 73.71        | 24.72         | 0.00          | 0.09          | 1.7              | 0.11                  | 0.00               |
| 113.58       | Crystal 1 pt.1  | 75.54        | 22.22         | 0.28          | 0.00          | 1.85             | 0.11                  | 12.72              |
| 113.58       | Crystal 1 pt.2  | 73.43        | 26.05         | 0.25          | 0.00          | 0.7              | 0.00                  | 47.59              |
| 113.58       | Crystal 1 pt.3  | 73.72        | 25.53         | 0.25          | 0.00          | 0.36             | 0.15                  | 33.03              |
| 113.58       | Crystal 1 pt.4  | 75.68        | 23.40         | 0.61          | 0.00          | 0.2              | 0.00                  | 65.63              |
| 113.58       | Crystal 1 pt.5  | 73.04        | 15.55         | 0.42          | 0.00          | 10.15            | 0.13                  | 3.71               |
| 113.58       | Crystal 1 pt.6  | 73.89        | 14.57         | 0.69          | 0.00          | 10.15            | 0.30                  | 5.99               |
| 113.58       | Crystal 1 pt.7  | 70.35        | 20.06         | 0.90          | 0.00          | 8.47             | 0.29                  | 9.39               |
| 113.58       | Crystal 3 pt.1  | 74.96        | 24.80         | 0.00          | 0.00          | 0.24             | 0.00                  | 0.00               |
| 113.58       | Crystal 3 pt.2  | 74.56        | 21.04         | 0.00          | 0.00          | 4.22             | 0.18                  | 0.00               |
| 113.58       | Crystal 3 pt.3  | 73.96        | 15.25         | 0.26          | 0.00          | 10.15            | 0.18                  | 2.43               |
| 113.58       | Crystal 3 pt.4  | 76.15        | 15.78         | 0.46          | 0.10          | 7.1              | 0.09                  | 5.69               |
| 113.58       | Crystal 3 pt.5  | 72.25        | 25.71         | 0.00          | 0.27          | 1.7              | 0.00                  | 0.00               |
| 113.58       | Crystal 4 pt.1  | 74.97        | 22.70         | 0.00          | 0.22          | 2.05             | 0.06                  | 0.00               |
| 113.58       | Crystal 4 pt.2  | 73.17        | 24.58         | 0.00          | 0.24          | 1.86             | 0.05                  | 0.00               |
| 113.58       | Crystal 4 pt.3  | 69.15        | 28.37         | 0.00          | 0.25          | 2.5              | 0.08                  | 0.00               |
| 113.58       | Crystal 4 pt.4  | 76.14        | 21.97         | 0.00          | 0.22          | 1.42             | 0.06                  | 0.00               |
| 113.58       | Crystal 4 pt.5  | 73.67        | 22.69         | 0.00          | 0.11          | 3.2              | 0.11                  | 0.00               |
| 113.58       | Crystal 4 pt.6  | 61.39        | 30.55         | 0.74          | 0.00          | 6.88             | 0.44                  | 9.22               |
| 113.58       | Crystal 4 pt.7  | 70.46        | 24.30         | 0.51          | 0.00          | 4.47             | 0.06                  | 9.68               |
| 113.58       |                 |              |               |               |               |                  |                       |                    |



**Supplementary Table S4. Results of EDS analyses on siderite samples and corresponding SEM images.**

| Depth [mbif] | Sample     | Mg [atomic %] | Ca [atomic %] | Mn [atomic %] | Fe [atomic %] | O [atomic %] | Depth [mbif] | Sample     | Mg [atomic %] | Ca [atomic %] | Mn [atomic %] | Fe [atomic %] | O [atomic %] |
|--------------|------------|---------------|---------------|---------------|---------------|--------------|--------------|------------|---------------|---------------|---------------|---------------|--------------|
| 0.16         | Crystal 1  | 1.60          | 0.43          | 0.59          | 20.53         | 43.97        | 36.74        | Crystal 6  | 0.29          | 0.17          | 0.88          | 8.84          | 70.98        |
| 0.16         | Crystal 1  | 1.75          | 0.41          | 0.84          | 23.55         | 40.98        | 36.74        | Crystal 6  | 0.30          | 0.17          | 1.09          | 15.28         | 58.51        |
| 0.16         | Crystal 1  | 5.81          | 0.51          | 0.45          | 17.12         | 46.90        | 36.74        | Crystal 6  | 0.33          | 0.09          | 0.96          | 13.44         | 62.79        |
| 0.16         | Crystal 1  | 0.44          | 0.55          | 0.86          | 22.54         | 41.68        | 36.74        | Crystal 6  | 0.38          | 0.08          | 0.60          | 8.79          | 74.85        |
| 0.16         | Crystal 2  | 1.28          | 0.23          | 0.27          | 11.73         | 64.70        | 36.74        | Crystal 6  | 0.00          | 0.22          | 1.23          | 12.35         | 63.74        |
| 0.16         | Crystal 2  | 0.35          | 0.20          | 0.43          | 4.31          | 84.23        | 36.74        | Crystal 6  | 0.00          | 0.22          | 1.29          | 12.38         | 63.94        |
| 0.16         | Crystal 2  | 4.26          | 0.31          | 0.21          | 8.87          | 70.12        | 36.74        | Crystal 6  | 0.24          | 0.18          | 1.39          | 14.63         | 59.51        |
| 0.16         | Crystal 2  | 1.09          | 0.32          | 0.51          | 15.97         | 57.57        | 36.74        | Crystal 6  | 0.31          | 0.19          | 2.11          | 13.46         | 59.93        |
| 0.16         | Crystal 3  | 0.29          | 0.15          | 3.26          | 7.66          | 67.44        | 82.6         | Crystal 2  | 0.51          | 0.09          | 0.26          | 11.07         | 71.23        |
| 0.16         | Crystal 3  | 0.35          | 0.22          | 3.53          | 11.31         | 58.16        | 82.6         | Crystal 2  | 3.17          | 0.00          | 0.00          | 4.52          | 75.98        |
| 0.16         | Crystal 3  | 0.76          | 0.20          | 4.11          | 11.11         | 57.65        | 82.6         | Crystal 2  | 0.53          | 0.12          | 0.39          | 11.69         | 67.45        |
| 0.16         | Crystal 3  | 0.40          | 0.33          | 6.10          | 19.47         | 39.06        | 82.6         | Crystal 3  | 0.35          | 0.12          | 1.00          | 13.86         | 62.06        |
| 0.16         | Crystal 3  | 0.58          | 0.38          | 7.71          | 17.83         | 38.67        | 82.6         | Crystal 3  | 0.49          | 0.14          | 0.52          | 13.03         | 65.06        |
| 0.16         | Crystal 3  | 1.24          | 0.33          | 6.42          | 18.11         | 39.91        | 82.6         | Crystal 3  | 0.55          | 0.17          | 0.99          | 13.55         | 61.69        |
| 0.16         | Crystal 6  | 1.81          | 0.14          | 0.71          | 16.98         | 55.68        | 82.6         | Crystal 3  | 0.53          | 0.15          | 0.54          | 13.75         | 64.48        |
| 0.16         | Crystal 6  | 2.69          | 0.16          | 0.62          | 13.72         | 60.98        | 82.6         | Crystal 3  | 0.33          | 0.10          | 0.96          | 13.44         | 62.90        |
| 0.16         | Crystal 7  | 1.26          | 0.36          | 1.02          | 13.27         | 60.82        | 82.6         | Crystal 4  | 0.51          | 0.15          | 1.01          | 15.46         | 58.27        |
| 0.16         | Crystal 7  | 1.86          | 0.35          | 0.93          | 14.50         | 58.20        | 82.6         | Crystal 4  | 0.64          | 0.18          | 0.53          | 15.91         | 58.58        |
| 0.16         | Crystal 7  | 1.40          | 0.33          | 0.77          | 11.04         | 65.52        | 82.6         | Crystal 4  | 0.46          | 0.10          | 0.57          | 12.50         | 67.28        |
| 0.16         | Crystal 8  | 0.34          | 0.23          | 3.73          | 12.43         | 56.63        | 82.6         | Crystal 7  | 0.46          | 0.09          | 0.19          | 10.14         | 73.30        |
| 0.16         | Crystal 8  | 0.55          | 0.21          | 3.54          | 12.65         | 55.58        | 82.6         | Crystal 7  | 0.46          | 0.10          | 0.86          | 12.96         | 63.91        |
| 0.16         | Crystal 8  | 1.46          | 0.20          | 3.78          | 9.72          | 59.19        | 82.6         | Crystal 7  | 0.59          | 0.12          | 0.56          | 12.91         | 63.50        |
| 0.16         | Crystal 8  | 0.14          | 0.12          | 1.64          | 18.19         | 51.82        | 82.6         | Crystal 8  | 0.65          | 0.13          | 0.43          | 12.36         | 65.41        |
| 0.16         | Crystal 9  | 0.29          | 0.10          | 1.22          | 16.35         | 55.10        | 82.6         | Crystal 8  | 0.24          | 0.13          | 0.92          | 18.30         | 54.00        |
| 0.16         | Crystal 9  | 0.24          | 0.09          | 1.45          | 14.80         | 57.53        | 82.6         | Crystal 8  | 1.01          | 0.31          | 0.14          | 10.79         | 71.00        |
| 0.16         | Crystal 10 | 0.70          | 0.20          | 0.35          | 16.10         | 58.74        | 82.6         | Crystal 8  | 0.70          | 0.17          | 0.38          | 14.50         | 61.57        |
| 0.16         | Crystal 10 | 0.56          | 0.25          | 0.49          | 17.53         | 55.72        | 82.6         | Crystal 12 | 0.33          | 0.13          | 1.20          | 15.02         | 59.99        |
| 0.16         | Crystal 10 | 0.77          | 0.26          | 0.30          | 15.27         | 60.37        | 82.6         | Crystal 12 | 0.43          | 0.13          | 1.02          | 15.23         | 59.40        |
| 0.16         | Crystal 11 | 0.79          | 0.29          | 0.27          | 13.72         | 65.12        | 82.6         | Crystal 12 | 2.14          | 0.19          | 0.28          | 12.24         | 64.03        |
| 0.16         | Crystal 11 | 0.04          | 0.25          | 0.74          | 24.98         | 40.52        | 82.6         | Crystal 12 | 0.48          | 0.13          | 0.60          | 14.09         | 62.98        |
| 0.16         | Crystal 11 | 0.21          | 0.37          | 1.65          | 22.20         | 43.97        | 91.57        | Crystal 2  | 1.36          | 0.45          | 0.36          | 13.64         | 62.18        |
| 0.16         | Crystal 11 | 1.63          | 0.72          | 0.13          | 18.17         | 53.37        | 91.57        | Crystal 2  | 1.14          | 0.35          | 0.58          | 11.35         | 65.96        |
| 0.16         | Crystal 12 | 0.10          | 0.16          | 6.16          | 19.48         | 40.08        | 91.57        | Crystal 2  | 0.82          | 0.29          | 1.05          | 11.86         | 63.63        |
| 0.16         | Crystal 12 | 0.44          | 0.21          | 3.92          | 7.76          | 67.86        | 91.57        | Crystal 2  | 2.48          | 0.41          | 0.55          | 12.41         | 61.56        |
| 0.16         | Crystal 12 | 0.15          | 0.26          | 5.66          | 10.56         | 55.84        | 91.57        | Crystal 4  | 1.05          | 0.40          | 0.74          | 14.42         | 59.14        |
| 0.16         | Crystal 12 | 0.62          | 0.20          | 3.58          | 7.00          | 64.72        | 91.57        | Crystal 4  | 1.22          | 0.45          | 0.30          | 12.21         | 64.75        |
| 0.16         | Crystal 12 | 0.77          | 0.20          | 3.36          | 6.50          | 66.51        | 91.57        | Crystal 4  | 1.44          | 0.45          | 0.16          | 9.39          | 72.48        |
| 6.25         | Crystal 1  | 3.22          | 0.55          | 1.44          | 20.76         | 42.60        | 91.57        | Crystal 5  | 1.10          | 0.38          | 0.83          | 14.90         | 58.43        |
| 6.25         | Crystal 1  | 3.16          | 0.60          | 1.63          | 20.82         | 42.37        | 91.57        | Crystal 5  | 0.88          | 0.32          | 0.71          | 13.43         | 61.53        |
| 6.25         | Crystal 1  | 18.72         | 0.08          | 0.00          | 3.14          | 58.51        | 91.57        | Crystal 5  | 1.80          | 0.16          | 0.08          | 3.41          | 76.06        |
| 6.25         | Crystal 2  | 1.36          | 0.30          | 0.74          | 12.83         | 62.61        | 91.57        | Crystal 6  | 1.09          | 0.29          | 0.60          | 12.13         | 64.46        |
| 6.25         | Crystal 2  | 13.72         | 0.07          | 0.05          | 2.28          | 66.28        | 91.57        | Crystal 6  | 1.50          | 0.51          | 0.34          | 13.87         | 61.42        |
| 6.25         | Crystal 5  | 1.94          | 0.64          | 1.62          | 22.14         | 41.03        | 91.57        | Crystal 6  | 1.12          | 0.37          | 0.56          | 12.81         | 61.48        |
| 6.25         | Crystal 5  | 0.96          | 0.56          | 1.71          | 23.27         | 40.28        | 91.57        | Crystal 6  | 0.95          | 0.36          | 1.07          | 14.72         | 57.75        |
| 6.25         | Crystal 5  | 2.58          | 0.69          | 1.52          | 21.09         | 41.36        | 91.57        | Crystal 6  | 0.73          | 0.30          | 1.13          | 15.03         | 58.23        |
| 6.25         | Crystal 6  | 1.69          | 0.55          | 1.16          | 22.23         | 40.71        | 91.57        | Crystal 6  | 0.99          | 0.41          | 0.78          | 12.71         | 63.83        |
| 6.25         | Crystal 6  | 2.66          | 0.65          | 1.34          | 21.84         | 41.76        | 91.57        | Crystal 8  | 0.10          | 0.03          | 0.03          | 0.63          | 76.36        |
| 6.25         | Crystal 8  | 2.26          | 0.69          | 1.38          | 22.22         | 41.35        | 91.57        | Crystal 8  | 2.63          | 0.36          | 0.24          | 13.05         | 63.49        |
| 6.25         | Crystal 8  | 1.84          | 0.69          | 1.37          | 22.69         | 41.00        | 91.57        | Crystal 8  | 0.49          | 0.25          | 1.06          | 11.60         | 61.66        |
| 6.25         | Crystal 9  | 2.33          | 0.76          | 1.84          | 22.11         | 40.82        | 91.57        | Crystal 8  | 0.96          | 0.44          | 0.44          | 13.50         | 61.73        |
| 6.25         | Crystal 9  | 2.19          | 0.55          | 1.08          | 22.37         | 41.71        | 91.57        | Crystal 8  | 1.18          | 0.46          | 0.49          | 14.29         | 60.60        |
| 6.25         | Crystal 9  | 1.88          | 0.58          | 1.47          | 22.32         | 41.33        | 91.57        | Crystal 9  | 1.08          | 0.37          | 0.59          | 14.07         | 61.30        |
| 6.25         | Crystal 10 | 2.88          | 0.66          | 1.56          | 21.59         | 41.63        | 91.57        | Crystal 9  | 0.00          | 0.24          | 2.05          | 11.93         | 60.86        |
| 6.25         | Crystal 10 | 2.33          | 0.68          | 1.95          | 22.14         | 40.70        | 91.57        | Crystal 9  | 1.05          | 0.33          | 0.66          | 13.20         | 62.42        |
| 12.35        | Crystal 2  | 1.41          | 0.31          | 6.95          | 17.11         | 38.63        | 91.57        | Crystal 9  | 0.54          | 0.33          | 0.80          | 14.49         | 60.19        |
| 12.35        | Crystal 2  | 0.60          | 0.27          | 5.66          | 19.44         | 39.43        | 91.57        | Crystal 9  | 1.05          | 0.33          | 1.15          | 14.71         | 58.80        |
| 12.35        | Crystal 2  | 1.51          | 0.33          | 7.94          | 16.72         | 39.38        | 91.57        | Crystal 9  | 0.22          | 0.16          | 2.95          | 14.65         | 55.61        |
| 12.35        | Crystal 5  | 1.18          | 0.40          | 7.55          | 17.57         | 38.97        | 113.58       | Crystal 2  | 0.00          | 0.10          | 1.73          | 12.71         | 62.57        |
| 12.35        | Crystal 5  | 1.75          | 0.35          | 7.16          | 16.99         | 39.99        | 113.58       | Crystal 2  | 0.00          | 0.14          | 0.64          | 13.59         | 63.65        |
| 12.35        | Crystal 5  | 1.61          | 0.34          | 7.50          | 16.97         | 39.62        | 113.58       | Crystal 2  | 0.30          | 0.17          | 2.32          | 12.72         | 59.11        |
| 12.35        | Crystal 8  | 1.69          | 0.30          | 5.79          | 18.49         | 40.20        | 113.58       | Crystal 2  | 0.17          | 0.19          | 2.13          | 14.54         | 57.41        |
| 12.35        | Crystal 8  | 1.54          | 0.25          | 5.43          | 18.59         | 40.64        | 113.58       | Crystal 2  | 0.00          | 0.17          | 0.60          | 15.35         | 60.16        |
| 12.35        | Crystal 8  | 2.01          | 0.24          | 5.58          | 18.33         | 40.60        | 113.58       | Crystal 5  | 2.91          | 0.58          | 0.13          | 12.30         | 66.41        |
| 12.35        | Crystal 10 | 0.64          | 0.36          | 6.89          | 18.43         | 39.07        | 113.58       | Crystal 5  | 1.84          | 0.39          | 0.12          | 12.22         | 67.73        |
| 12.35        | Crystal 10 | 1.89          | 0.39          | 7.63          | 16.08         | 40.34        | 113.58       | Crystal 5  | 3.07          | 0.70          | 0.15          | 11.85         | 66.92        |
| 12.35        | Crystal 10 | 0.48          | 0.34          | 6.69          | 19.00         | 38.77        | 113.58       | Crystal 5  | 0.99          | 0.29          | 0.37          | 15.19         | 60.03        |
| 12.35        | Crystal 11 | 0.81          | 0.30          | 5.19          | 20.19         | 39.35        | 113.58       | Crystal 5  | 1.63          | 0.37          | 0.16          | 11.57         | 69.22        |
| 12.35        | Crystal 11 | 0.80          | 0.30          | 5.56          | 19.70         | 39.39        | 113.58       | Crystal 5  | 3.26          | 0.71          | 0.22          | 11.22         | 67.89        |
| 12.35        | Crystal 11 | 0.77          | 0.29          | 5.78          | 19.34         | 39.55        | 113.58       | Crystal 7  | 0.48          | 0.20          | 1.02          | 17.90         | 54.03        |
| 12.35        | Crystal 13 | 0.69          | 0.13          | 2.25          | 5.14          | 75.53        | 113.58       | Crystal 7  | 1.00          | 0.34          | 0.30          | 15.77         | 58.67        |
| 12.35        | Crystal 13 | 1.44          | 0.31          | 7.56          | 17.34         | 39.21        | 113.58       | Crystal 7  | 1.22          | 0.22          | 0.42          | 11.64         | 66.88        |
| 12.35        | Crystal 13 | 0.97          | 0.36          | 8.88          | 16.55         | 38.45        | 113.58       | Crystal 7  | 0.92          | 0.20          | 0.41          | 10.51         | 71.72        |
| 36.74        | Crystal 4  | 0.00          | 0.16          | 2.34          | 12.34         | 61.32        | 113.58       | Crystal 7  | 0.61          | 0.23          | 0.53          | 15.16         | 59.99        |
| 36.74        | Crystal 4  | 0.00          | 0.15          | 2.52          | 11.46         | 62.45        | 113.58       | Crystal 7  | 0.13          | 0.17          | 3.05          | 14.45         | 55.01        |
| 36.74        | Crystal 4  | 0.21          | 0.22          | 1.14          | 10.44         | 67.16        | 113.58       | Crystal 9  | 0.16          | 0.26          | 0.68          | 16.65         | 56.47        |
| 36.74        | Crystal 4  | 0.00          | 0.21          | 1.14          | 11.97         | 66.75        | 113.58       | Crystal 9  | 0.00          | 0.15          | 2.17          | 14.91         | 56.69        |
| 36.74        | Crystal 4  | 0.21          | 0.13          | 1.22          | 10.83         | 68.29        | 113.58       | Crystal 9  | 0.00          | 0.21          | 1.05          | 14.46         | 60.28        |
| 36.74        | Crystal 4  | 0.00          | 0.00          | 0.08          | 19.59         | 53.84        | 113.58       | Crystal 9  | 0.94          | 0.30          | 0.25          | 14.94         | 60.88        |
| 36.74        | Crystal 6  | 0.00          | 0.23          | 1.46          | 13.85         | 61.60        | 113.58       | Crystal 9  | 1.13          | 0.19          | 0.61          | 9.78          | 66.23        |
| 36.74        | Crystal 6  | 0.24          | 0.20          | 1.24          | 11.85         | 65.06        | 113.58       | Crystal 9  | 1.44          | 0.57          | 0.26          | 15.41         | 59.00        |

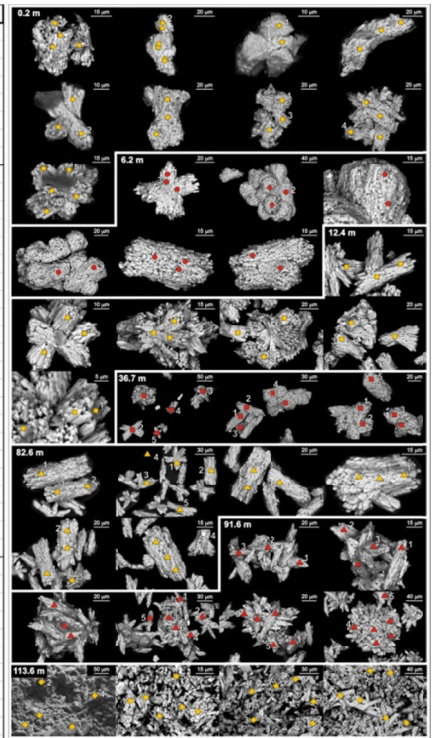

Supplementary Table S5. Results of EDS analyses on vivianite samples and corresponding SEM images.

| Depth [mbf] | Sample     | P [atomic %] | Mn [atomic %] | Fe [atomic %] | O [atomic %] | Depth [mbf] | Sample     | P [atomic %] | Mn [atomic %] | Fe [atomic %] | O [atomic %] |
|-------------|------------|--------------|---------------|---------------|--------------|-------------|------------|--------------|---------------|---------------|--------------|
| 23.36       | Crystal 3  | 6.11         | 1.60          | 6.81          | 67.09        | 36.74       | Crystal 3  | 7.94         | 2.18          | 8.14          | 62.80        |
| 23.36       | Crystal 3  | 6.25         | 1.38          | 6.73          | 68.99        | 36.74       | Crystal 3  | 3.11         | 0.70          | 3.50          | 63.20        |
| 23.36       | Crystal 3  | 7.22         | 2.28          | 8.11          | 63.93        | 36.74       | Crystal 3  | 0.47         | 5.12          | 33.00         | 59.53        |
| 23.36       | Crystal 4  | 6.65         | 2.22          | 7.93          | 65.63        | 36.74       | Crystal 3  | 6.88         | 2.29          | 14.26         | 63.85        |
| 23.36       | Crystal 4  | 7.28         | 2.75          | 8.66          | 62.70        | 36.74       | Crystal 3  | 0.45         | 4.14          | 33.54         | 59.72        |
| 23.36       | Crystal 4  | 5.88         | 2.38          | 9.32          | 64.13        | 36.74       | Crystal 3  | 4.68         | 2.81          | 22.25         | 62.56        |
| 23.36       | Crystal 4  | 6.71         | 2.08          | 8.29          | 64.83        | 36.74       | Crystal 3  | 2.19         | 4.09          | 28.87         | 63.81        |
| 23.36       | Crystal 5  | 6.75         | 1.75          | 8.40          | 64.87        | 36.74       | Crystal 3  | 1.24         | 2.75          | 17.23         | 62.71        |
| 23.36       | Crystal 5  | 6.68         | 1.38          | 8.42          | 65.59        | 36.74       | Crystal 4  | 7.39         | 1.61          | 8.61          | 63.62        |
| 23.36       | Crystal 5  | 6.51         | 1.40          | 7.31          | 67.40        | 36.74       | Crystal 4  | 7.75         | 2.30          | 9.41          | 63.94        |
| 23.36       | Crystal 6  | 7.59         | 3.14          | 8.20          | 63.73        | 36.74       | Crystal 4  | 6.20         | 2.98          | 15.94         | 63.90        |
| 23.36       | Crystal 6  | 6.47         | 1.63          | 7.94          | 63.93        | 36.74       | Crystal 4  | 8.59         | 3.12          | 9.60          | 63.17        |
| 23.36       | Crystal 6  | 4.82         | 1.34          | 5.33          | 63.75        | 36.74       | Crystal 4  | 7.00         | 2.49          | 13.61         | 64.15        |
| 23.36       | Crystal 6  | 6.06         | 0.72          | 7.11          | 64.51        | 36.74       | Crystal 6  | 3.57         | 2.22          | 7.36          | 64.35        |
| 23.36       | Crystal 8  | 6.64         | 1.81          | 6.98          | 63.76        | 36.74       | Crystal 6  | 7.03         | 2.79          | 9.16          | 64.28        |
| 23.36       | Crystal 8  | 7.41         | 1.85          | 9.47          | 64.14        | 36.74       | Crystal 6  | 6.59         | 2.31          | 9.78          | 64.23        |
| 23.36       | Crystal 8  | 6.63         | 1.24          | 8.90          | 64.12        | 36.74       | Crystal 7  | 7.23         | 1.59          | 9.49          | 64.10        |
| 23.36       | Crystal 9  | 3.02         | 1.61          | 5.80          | 65.36        | 36.74       | Crystal 7  | 6.72         | 1.82          | 9.72          | 64.03        |
| 23.36       | Crystal 9  | 5.45         | 1.76          | 7.67          | 64.30        | 36.74       | Crystal 7  | 7.80         | 2.55          | 11.32         | 62.88        |
| 23.36       | Crystal 11 | 6.68         | 1.81          | 7.36          | 63.45        | 36.74       | Crystal 8  | 7.80         | 1.67          | 9.12          | 63.55        |
| 23.36       | Crystal 11 | 7.67         | 2.56          | 8.22          | 63.30        | 36.74       | Crystal 8  | 4.57         | 3.59          | 19.93         | 62.62        |
| 23.36       | Crystal 11 | 6.26         | 1.73          | 6.89          | 63.60        | 36.74       | Crystal 8  | 7.25         | 1.70          | 8.12          | 63.56        |
| 23.36       | Crystal 12 | 7.96         | 2.33          | 8.35          | 63.73        | 36.74       | Crystal 8  | 7.75         | 2.01          | 10.20         | 63.04        |
| 23.36       | Crystal 12 | 7.85         | 2.21          | 8.47          | 63.24        | 36.74       | Crystal 10 | 7.30         | 1.36          | 8.87          | 64.00        |
| 23.36       | Crystal 12 | 6.63         | 2.21          | 8.34          | 64.25        | 36.74       | Crystal 10 | 8.29         | 2.33          | 9.98          | 63.81        |
| 23.36       | Crystal 12 | 8.48         | 2.47          | 10.17         | 64.70        | 36.74       | Crystal 10 | 7.35         | 1.90          | 10.68         | 64.28        |
| 36.74       | Crystal 1  | 7.02         | 2.11          | 8.49          | 63.65        | 36.74       | Crystal 10 | 8.14         | 1.72          | 11.13         | 64.10        |
| 36.74       | Crystal 1  | 6.50         | 2.94          | 11.70         | 64.20        | 36.74       | Crystal 10 | 8.50         | 2.58          | 10.24         | 64.46        |
| 36.74       | Crystal 1  | 6.82         | 1.94          | 7.58          | 63.22        | 36.74       | Crystal 10 | 8.11         | 2.60          | 10.13         | 63.98        |
| 36.74       | Crystal 1  | 6.52         | 1.34          | 7.26          | 63.79        | 36.74       | Crystal 12 | 7.90         | 2.43          | 11.90         | 63.75        |
| 36.74       | Crystal 1  | 6.42         | 1.67          | 7.24          | 63.57        | 36.74       | Crystal 12 | 7.10         | 2.14          | 7.65          | 63.08        |
| 36.74       | Crystal 1  | 6.07         | 1.68          | 7.14          | 63.93        | 36.74       | Crystal 16 | 5.39         | 1.36          | 6.42          | 64.22        |
| 36.74       | Crystal 1  | 7.41         | 1.79          | 10.26         | 63.80        | 36.74       | Crystal 16 | 7.23         | 2.03          | 11.54         | 63.94        |
| 36.74       | Crystal 3  | 6.40         | 3.15          | 10.23         | 63.44        | 36.74       | Crystal 16 | 7.81         | 3.16          | 11.84         | 63.29        |
| 36.74       | Crystal 3  | 7.76         | 2.38          | 7.99          | 63.16        | 46.83       | Crystal 1  | 4.99         | 0.32          | 7.06          | 65.90        |
| 36.74       | Crystal 3  | 0.50         | 1.73          | 10.76         | 64.24        | 46.83       | Crystal 2  | 5.95         | 0.48          | 7.98          | 65.21        |
| 36.74       | Crystal 3  | 6.50         | 1.80          | 11.46         | 64.02        | 46.83       | Crystal 2  | 5.09         | 0.35          | 7.03          | 65.45        |
| 36.74       | Crystal 3  | 6.45         | 1.61          | 7.58          | 63.79        | 46.83       | Crystal 2  | 5.56         | 0.37          | 7.33          | 65.47        |

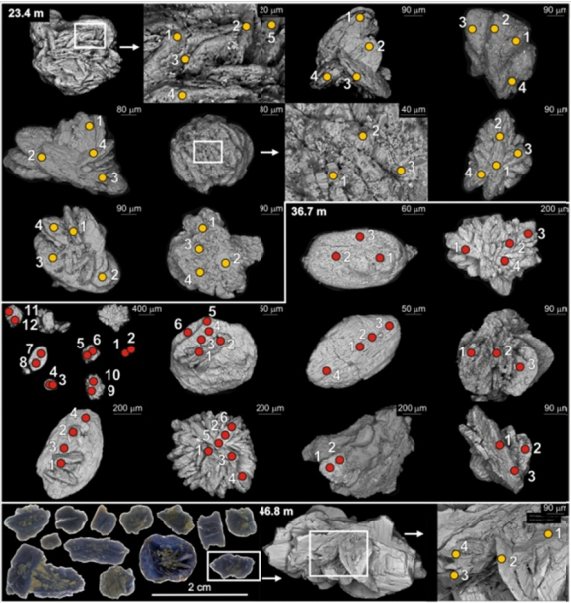

Supplement: Supplementary file 1 [file 34862508]
